# Supplementary material
Source: Research Square preprint supplement (doi:10.21203/rs.3.rs-9548685/v1)
Supplement: Supplementary file 1 [file 57f0c48dd12f4e5865b6f407.pdf]

# Hip Strength Imbalances and Trunk-Pelvis Coordination During Soccer Kicking

## METHODS

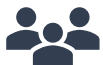

**18 Male Soccer Players**

Inside kick (Maximum effort)

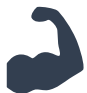

**Multi-Planar Isokinetic Strength**

IR/ER & Ab/Ad Ratios  
(180°/s & 300°/s)

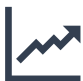

**1D-SPM Linear Regression**

Continuous kinematic waveforms

## KEY FINDINGS

### STANCE LEG

**Relative External Rotator Weakness**

- ↳ **Premature Pelvic Rotation**
- ↳ **Compensatory High-Velocity Internal Rotation**

### KICKING LEG

**Relative Adductor Weakness (300°/s)**

- ↳ **Contralateral Trunk Lateral Flexion**
- ↳ **Mechanical forcing of hip abduction (AOS)**

## CLINICAL IMPLICATION

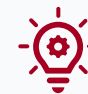

**Altered Intersegmental Coordination**

Potential increase in active deceleration demand

Theoretical alteration of shearing forces
